# Supplementary material
Source: publisher figshare collection journal article supplement (https://acs.figshare.com/ndownloader/files/4848640)
Supplement: Supplementary file 1 [file 4848640]

SUPPORTING INFORMATION

Shape-Dependent Surface Reactivity and Antimicrobial Activity of Nano-Cupric Oxide

Leanne M. Gilbertson<sup>1,2\*</sup>, Eva M. Albalghiti<sup>2</sup>, Zachary S. Fishman<sup>2</sup>, François Perreault<sup>2,3</sup>, Charlie Corredor<sup>5</sup>, Jonathan D. Posner<sup>5,6</sup>, Menachem Elimelech<sup>2</sup>, Lisa D. Pfefferle<sup>2</sup>, Julie B. Zimmerman<sup>2,4</sup>

<sup>1</sup>*Department of Civil and Environmental Engineering, University of Pittsburgh, Pittsburgh, Pennsylvania, 15261, USA*

<sup>2</sup>*Department of Chemical and Environmental Engineering, Yale University, New Haven, CT 06520, USA*

<sup>3</sup>*School of Sustainable Engineering and the Built Environment, Arizona State University, Tempe, AZ 85287, USA*

<sup>4</sup>*School of Forestry and Environmental Studies, Yale University, New Haven, CT 06520, USA*

<sup>5</sup>*Department of Chemical Engineering, University of Washington, Seattle, WA 98195, USA*

<sup>6</sup>*Department of Mechanical Engineering, University of Washington, Seattle, WA 98195, USA*

Pages S1-S15

Figures S1-S9

\*Corresponding Author: Leanne M. Gilbertson, [LMG110@pitt.edu](mailto:LMG110@pitt.edu), Phone: 412-624-1683

## MATERIALS AND METHODS

### *Crystal Structure Determination by Powder X-Ray Diffraction (XRD).*

The XRD measurements were carried out with a Rigaku SmartLab X-ray diffractometer using Cu K $\alpha$  radiation ( $\lambda=1.5418$  Å) with a rotating anode source, operated at 45 kV and 200 mA.

### *Morphology and Size via Electron Microscopy.*

The micro and nanostructure morphologies of the materials were characterized by Hitachi SU-70 scanning electron microscopy (SEM) and FEI Tecnai Osiris 200kV Tunneling electron microscopy (TEM). Samples were prepared for SEM by depositing dry powder on carbon tape. For TEM, samples were bath sonicated in ethanol, drop cast onto a gold grid, and left to dry. Micrographs were acquired from multiple locations for each sample.

### *CuO Nanosheet Thickness Measurements via Atomic Force Microscopy (AFM).*

The thickness of CuO nanosheets was determined using a Bruker Dimension Fastscan Atomic Force Micrometer (AFM). Samples were ultrasonicated in ethanol and drop cast onto a glass slide prior to measurement. The thickness was determined to be 10 – 20 nm and associated micrographs are presented in Figure S2.

### *Surface Area by Brunauer, Emmett and Teller (BET) Method.*

The surface area of all CuO dry material was measured using a Quanta Chrome Autosorb-1C static volumetric instrument. Samples were degassed at 200°C for at least 4 hours and then measured using an eleven point BET protocol. The linear region of the BET plot of the N<sub>2</sub> adsorption/desorption isotherm were used to calculate specific surface area. Measurements were repeated in duplicate and reported as an average and standard deviation of the replicate collections.

### *Dispersed Aggregate Morphology in Experimental Media via Static Light Scattering.*

The structural morphology, quantified here as the fractal dimension ( $D_f$ ), of the dispersed CuO bulk, nanopowder, and nanosheets was determined using static light scattering (SLS) as previously described.<sup>51-53</sup> The stock dispersions were prepared by bath sonication 2 mg of each CuO sample in 10 mL of DI water (15 min, VWR Model 150T, 135 W, 0.2 mg/mL). Immediately after sonication, the stock was diluted 10-fold. SLS data was collected with a multidetector light scattering unit (ALV-GmbH) with a Nd:vanadate laser (Verdi V2, Coherent, Inc., Santa Clara, CA) operating at a wavelength of 532 nm. Multiple iterations were performed for each CuO sample, correcting the photodetector sensitivity at each iteration, to optimize the linear fit of the data.

### *Zeta Potential Measurements to Evaluate CuO Surface Charge and Stability in Biological Media and Over a pH Range.*

The surface charge and stability of CuO bulk, nanopowder, and nanosheets is important for understanding potential interactions with biological organisms, such as gram-negative *E.coli* used in this study. As such, electrophoretic mobility measurements were collected for each CuO sample using the NanoBrook Omni (Brookhaven Instruments, NY) with a 659 nm laser. Samples were prepared in the same manner as for light scattering experiments (0.2 mg/mL, 15 min

sonication, 10-fold dilution) in the biological media (0.9% NaCl). The average and standard deviation of the zeta potential (using Smoluchowski analysis type) are determined from 10 runs (30 cycles per run) for each sample.

In addition, electrophoretic mobility measurements were collected over a range of pH (2 – 9) for the CuO nanosheets to determine the dependence of material stability as a function of proton concentration of the suspension media. Zeta potential of CuO nanosheets was determined at a fixed concentration, 20 ppm, using dynamic light scattering (DLS) (NICOMP 380 ZLS, Particle Sizing Systems, Santa Barbara, CA) over a 15 min time period. The zeta potentials of particles influence their electrophoretic mobility, as describe by the Henry equation and the Smoluchowski approximation.<sup>90</sup> All working solutions were prepared in ultrapure water (18.3 MΩ-cm, Milli-Q Advantage A10® system, Millipore Corp., Billerica, MA) by first placing the experimental vial on a rotary shaker (50 rpm) for 20 min at room temperature (23 °C), followed by mild sonication for 1 h (40 kHz, 2510DTH Branson, Ultrasonic Corp., Danbury, CT) prior to each experiment. A stock 500 mM buffer solutions was prepared for each buffer (e.g., HEPES, citric acid, tris, bis-tris) at 22 ± 1 °C. All reagents were purchased from Sigma Aldrich. Each stock buffer solution had a pH near the pKa of the respective buffer for maximum buffering capacity.<sup>91</sup> Stock 500 mM buffer solutions were diluted to 20 mM with DI water prior to measuring pH of the solutions using a dual conductivity and pH meter.

#### *Inductively Coupled Plasma Mass Spectrometry (ICP-MS).*

The presence and concentration of Cu<sup>2+</sup> in filtrates were analyzed using ICP-MS (Perkin Elmer DRC-e) with a Scott Crossflow nebulizer and argon plasma. An internal scandium standard was teed into analysis with a glass mixing tee. A certified copper standard at 1000 ppm (± 1%, Fisher Scientific) was used to create a six-point calibration curve. CuO filtrates were diluted 10-fold and acidified (1% HNO<sub>3</sub>, 10 mL total volume) prior to data collection. While both <sup>63</sup>Cu and <sup>65</sup>Cu were measured, <sup>63</sup>Cu was used for analysis and there was no significant difference between the trends for each isotope. Each reading included an average of 20 sweeps. The average and standard deviation of three readings was reported. Quality control readings were periodically performed to ensure limited drift during analysis.

#### *Determination of CuO Interaction with E. coli Cells.*

The presence or absence of CuO materials (bulk, nanopowder, nanosheets) in bacterial cells was evaluated using a combination of transmission electron microscopy (TEM), scanning TEM (STEM), and elemental mapping *via* electron energy-loss spectrometer. Samples were prepared for imaging by following the method described by Perreault, et al.<sup>73</sup> Briefly, *E. coli* were prepared and exposed to the same experimental conditions as described below. After the 1 hour exposure time, a total of 10<sup>9</sup> cells/mL for each treatment condition was centrifuged (1 min, 5,000 × g) to form a visible pellet in a 1.5 mL Eppendorf tube and fixed in Karnovsky's fixative (2% paraformaldehyde, 2.5% glutaraldehyde in 0.2 M Sorenson's buffer, pH 7.2) overnight at 4°C. After fixation, the pellet was washed (3 × 10 min) with a washing buffer (0.1 M cacodylate, 0.1 % CaCl<sub>2</sub>, pH 7.2) and stained with osmium tetroxide (1% OsO<sub>4</sub>, 1.5 % KFeCN in water) for 2h at 4°C. After staining, the pellet was washed with DI water (3 × 10 min) and dehydrated in increasing concentrations of acetone (30, 50, 70, 80, 90 and 100% acetone, 3 × 10 min each). Dehydrated samples were infiltrated with resin (EMbed 812, Electron Microscopy Sciences, Hatfield, PA) at room temperature by adding to the pellet solutions of resin:acetone 1:1 (overnight), 2:1 (4 h), 3:1 (overnight), and pure resin (4 h). For pure resin embedding, the sample

was kept under vacuum to remove air bubbles, and then cured at 58°C for 48 h. Embedded samples were cut into 70 nm slices with a Leica Ultra Cryo UC7 microtome (Leica Mikrosystem GmbH, Vienna, Austria) equipped with a diamond knife (DiATOME, Hatfield, PA) and placed on a gold grid (Holey Carbon, 200 mesh, Electron Microscopy Sciences, Hatfield, PA) for TEM analysis. Samples were visualised with a FEI Tecnai Osiris microscope, operating at an acceleration voltage of 200 kV. The nature of the metallic material found inside the cell was determined by electron energy loss spectroscopy (EELS).

#### *Material Reactivity*

##### *Electrochemical Activity Assay.*

The CuO electrodes were scanned at 50 mV/sec from -600 mV to 400 mV. Impedance measurements were performed using an AC amplitude of 20 mV and a frequencies of 500, 1000, and 2000 hz. The flatband potential of a material can be determined using the below equation derived from the imaginary part of the impedance equation

$$\frac{1}{C^2} = \left( \frac{2}{e\epsilon\epsilon_0 A^2 N_D} \right) \left[ (V - V_{fb}) - \frac{k_b T}{e} \right] \quad (1),$$

where  $C$  is the capacitance,  $e$  is the charge of an electron,  $\epsilon$  is the dielectric constant of CuO,  $\epsilon_0$  is the permittivity of vacuum,  $A$  is the surface area,  $N_D$  is the charge carrier density,  $V$  is the applied voltage,  $V_{fb}$  is the flat band potential,  $k_b$  is Boltzmann's constant, and  $T$  is the absolute temperature. By plotting the inverse of the capacitance squared against applied voltage, a line may be extrapolated to the x-axis for the linear portion of the curve. The x-intercept corresponds to  $V_{fb}$ , the flat band potential.

##### *Catalytic Surface Reactivity Assay.*

It has been shown that metal nanomaterials are catalytically active due to the reduction of their redox potential.<sup>92</sup> Thus, to act as an effective catalyst for this particular dye-reducing agent pair, the redox potential of CuO materials must fall between the reduction potential of MB and  $\text{BH}_4$  as the reaction is thermodynamically favorable (not kinetically favorable).<sup>93</sup>

CADE consists of final concentrations of 40  $\mu\text{M}$  Methylene blue (CAS: 7220-79-3, Sigma-Aldrich, St. Louis, MO), 10 mM Sodium Borohydrate (CAS: 16940-66-2, Sigma-Aldrich, St. Louis, MO), and 10 mM HEPES (CAS: 7365-45-9 Sigma-Aldrich, St. Louis, MO) at pH = 7. 10 mM HEPES served as the buffering agent to maintain constant pH throughout the experimental procedures. All working solutions were prepared by dispersing CuO materials in ultrapure water (18.3 M $\Omega$ -cm, Milli-Q Advantage A10® system, Millipore Corp., Billerica, MA) using a rotary shaker (50 rpm) for 20 min at room temperature (23 °C), followed by mild sonication for 1 h (40 kHz, 2510DTH Branson, Ultrasonic Corp., Danbury, CT) prior to each experiment. Each experiment began by mixing with a micro magnetic stirring bar, driven by an external magnetic mixer (Cat: H370170, Scienceware, Wayne, NJ). The CuO working solution was mixed with a small aliquot of concentrated  $\text{BH}_4$  and HEPES solution to reach a final concentration of 10 mM for both reagents. Then, a small volume of concentrated dye was added to a final concentration of 40  $\mu\text{M}$  in a 2.5 mL working volume. CADE's absorbance was continuously monitoring with a portable UV-Vis spectrometer (USB2000+XR1-ES Ocean Optics, Dundin, FL) at the maximum dye's absorbance peak of  $\lambda_{\text{max}} = 664$  nm. CuO catalytic detection studies were preformed in 3 mL disposable methacrylate cuvette (Cat: 9014, Perffector Scientific, Atascadero, CA) with an optical path length of 1 cm.

The beta,  $\beta$ , value was determined in order to quantify differences in surface catalytic activity of the CuO materials and is the asymptotic constant extracted from equation 4.  $\beta$  is determined *via* the best-fit curve of the plot of the absorbance as a function of time (shown in Figure 1b and S5), with an exponential curve, given as

$$OD = OD_o e^{-\frac{t}{\tau}} + \beta \quad (2),$$

where  $OD$  is the optical density of CADE solution,  $OD_o$  is the optical density at  $t = 0$ ,  $\tau$  is the exponential decay rate constant,  $t$  is the time transpired from the addition of the CuO particles, and  $\beta$  is a constant that represents the asymptotic  $OD$  value.  $OD$  data processing and analysis was performed by a custom code written in MATLAB (MathWorks Inc., Natick, MA). We fit  $\tau$  and  $\beta$  values (41.8 s and 2.2 for the data shown in Figure 1b and S5), which respectively represent the decay time at which the dye absorbance is reduced to 1/e of its initial value and the steady state  $OD$  that is reached at long times.  $\beta$  values have a dynamic range of 0.01 to 2.8 and potentially serve as a nanoparticle reactivity indicator.

## Cytotoxicity Evaluation

### *Acellular Assay: CuO-Mediated Glutathione (GSH) Oxidation*

The CuO samples were prepared by dispersing *via* bath sonication (15 min, VWR Model 150T, 135 W, 0.2 mg/mL, 10 mL) in deionized water. (Note: the sonication time of 15 minutes was determined experimentally as the minimum amount of time required to sufficiently disperse all CuO materials. Photos of the dispersions after sonication can be found in Figure S7. Experimental solutions were prepared in triplicate and each vial contained the prepared CuO material, buffer (50 mM  $\text{HCO}_3^-$ , final concentration), and GSH (98%, ACROS Organics, 33 mM final concentration). The sample vials were rotated constantly throughout the experiment to prevent settling. At specific time points, an aliquot (0.9 mL) was removed from the experimental solution and added to a solution of Ellman's reagent (5,5'-dithio-bis(2-nitrobenzoic acid), DTNB,  $\geq 98\%$ , Sigma-Aldrich, 1.2 mM final concentration) buffered with TRIS-HCl (ultrapure, American Bioanalytical, pH = 8.3). The experimental solution was filtered (0.22  $\mu\text{m}$  syringe filter, PES Whatman), to avoid the potential for confounding interference with the photometric detection. The concentration of GSH in each sample was quantified by measuring the optical density at 412 nm ( $OD_{412}$ ). Each CuO sample was compared to the control (no CuO) at each time point to obtain a percent oxidation of GSH according to the Beer-Lambert Law:

$$c = \frac{A}{\epsilon \cdot l} \quad (3),$$

where  $c$  is the concentration of thiol (M),  $A$  is the absorbance at 412 nm,  $\epsilon$  is the extinction coefficient (14,150  $\text{M}^{-1} \text{cm}^{-1}$  for Ellman's reagent at 412 nm), and  $l$  is the path length (cm).

## RESULTS AND DISCUSSION

### Material Characterization

The crystalline structure of the three CuO materials was confirmed by X-ray diffraction (XRD). The characteristic diffraction peaks in the XRD spectra (Figure S1d) is signature for cupric oxide, resulting from the (110), ( $\bar{1}11$ )/(002), (111)/(200), ( $\bar{2}02$ ), (020), (202) lattice plane.<sup>48</sup> Peak broadening in the nanopowder and nanosheet samples, compared to the bulk CuO sample, is expected for materials containing at least one dimension on the nanoscale.<sup>49</sup>

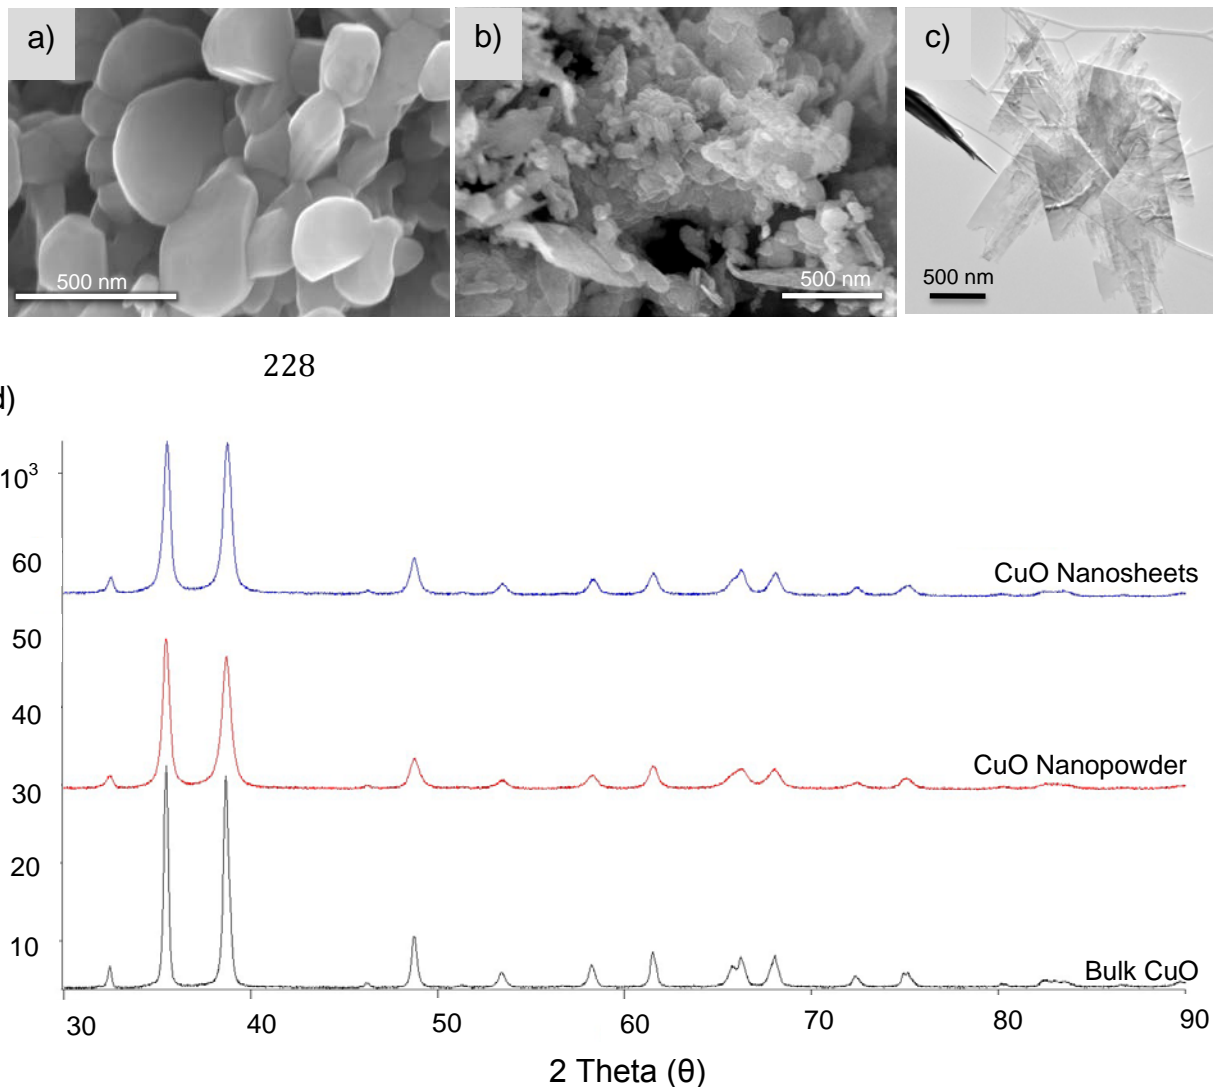

**Figure S1.** Compiled characterization data for the three copper oxide materials studied. a) SEM micrograph of bulk CuO, b) SEM micrograph of CuO nanopowder, and c) TEM micrograph of CuO nanosheets, indicating shape and approximate size of each type of material. d) X-ray diffraction data confirming same chemical composition, 1:1::Cu:O based on the signature crystal structure.

Morphology, dimensions, and shape were determined using transmission and scanning electron microscopy, TEM and SEM respectively, as well as atomic force microscopy (AFM). Representative TEM (nanosheets) or SEM (bulk and nanopowder) micrographs of the three CuO materials are compiled in Figure S1a-c indicating that bulk CuO is composed of plate-like particles (500 nm – 3  $\mu$ m), CuO nanopowder is composed of irregular sphere-like shaped particles (< 50 nm), and CuO nanosheets are composed sheet-like particles of heterogenous lengths and widths (250 nm – 1  $\mu$ m each). AFM was utilized to determine the thickness of the nanosheets (10 – 20 nm) as shown in Figure S2. The size dimensions determined by electron microscopy are associated with single particles of the given CuO material. Yet, larger aggregates – a compilation of individual particles bound by intermolecular forces (e.g., van der Waals, electrostatic) – are observed in the EM micrographs (Figure S1a-c). While sonication is effective at disaggregating large agglomerates, it is near impossible to obtain stable single CuO particles without the use of surface functionalization or surfactants, particularly in biological or environmental media.<sup>50</sup> The focus of this study is on the behavior of the parent material under experimental conditions and therefore, the samples are characterized under these conditions without modification.

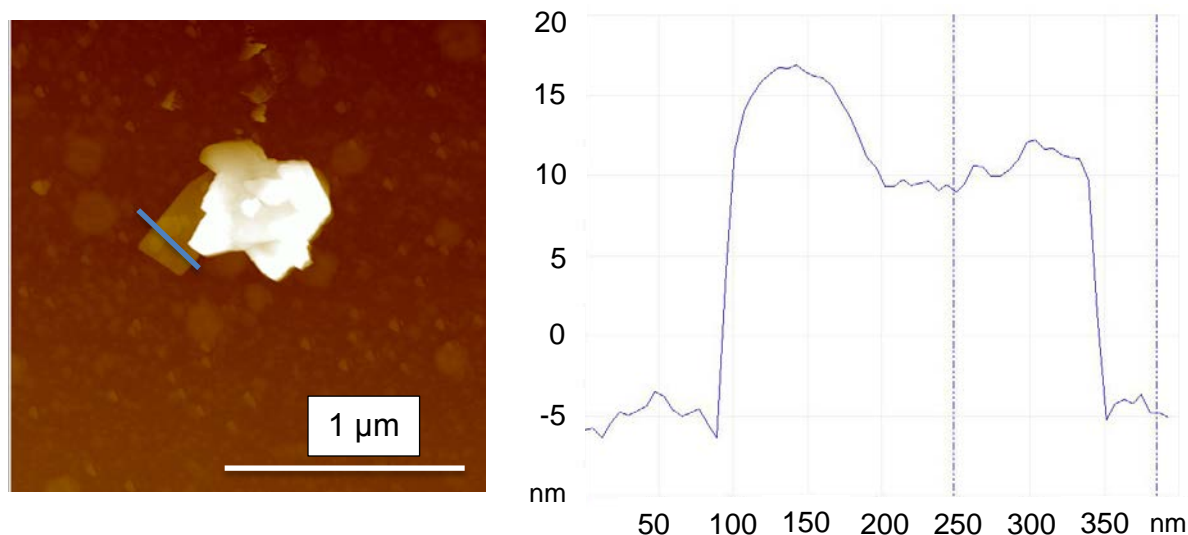

**Figure S2.** AFM micrograph of CuO Nanosheet and associated sheet thickness (approximately 15 nm).

The relative dispersed aggregate size was determined by dynamic light scattering (DLS). Data for CuO nanopowder and nanosheets is compiled in Figure S3 as probability distributions of diffusion time ( $\tau$ ) determined through CONTIN analysis of the compiled raw correlation functions.<sup>51</sup> Smaller values of  $\tau$  are associated with shorter diffusion times and thus, smaller particles or aggregates. Larger values of  $\tau$  are associated with longer diffusion times and thus, larger particles or aggregates. Therefore, the location of the probability distributions along the horizontal axis corresponds with the relative aggregate of the dispersed samples. Aggregate size approximations were determined using Stoke-Einstein equation, which requires the spherical particle assumption, and the  $\tau$ -value is associated with the peak in the distribution curve.<sup>51</sup> The range in dispersed aggregate size, or polydispersity, is represented by the width of the probability distribution. Here, polydispersity is quantified as the full width at half maximum (FWHM) of the

probability distribution.<sup>51</sup> Estimated dispersed aggregate size and size distribution are reported in Table 1 for the CuO nanopowder and nanosheet samples (data is not reported for the bulk CuO sample due to instability and significant settling). The dispersed aggregates of the CuO nanopowder sample are smaller (~157 nm) and more monodisperse (FWHM = 888) than the nanosheets (~557 nm and FWHM = 2717, respectively). In addition to the dispersed aggregate size, light scattering was utilized to determine the relative dispersed aggregate morphology *via* static light scattering (SLS). SLS enables quantification of the fractal dimension ( $D_f$ ) – a value that indicates whether aggregates are sphere-like ( $D_f \sim 3$ ), plate-like ( $D_f \sim 2$ ) or rod-like ( $D_f \sim 1$ ).<sup>51-53</sup> The aggregates of nanopowder, with a  $D_f = 2.1$ , are more plate-like in morphology compared to the more rod-like CuO nanosheets ( $D_f = 1.3$ ).

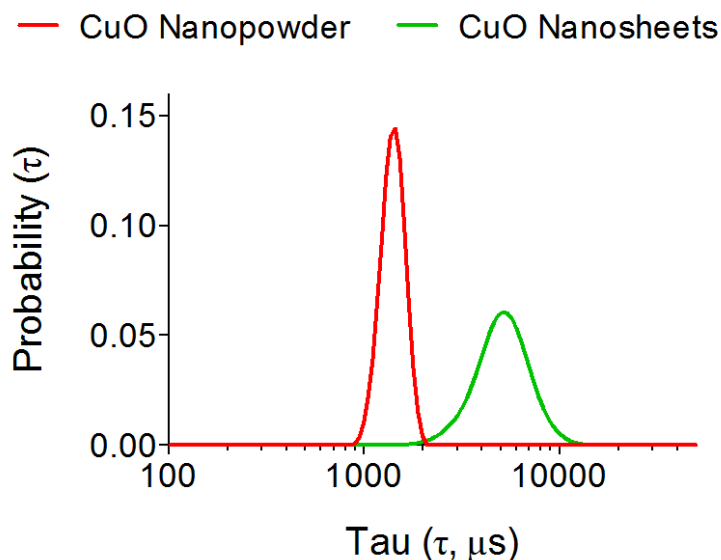

**Figure S3.** Probability distribution of diffusion time ( $\tau$ ) for CuO nanopowder and nanosheets as determined via dynamic light scattering. Samples were dispersed in biological media (0.9% NaCl, 0.2 mg/mL) and diluted ten-fold prior to sample collection (75 runs, 10 seconds each). The distributions are determined by applying the CONTIN algorithm to the compiled raw correlations functions. Approximate aggregate size is estimated from the peak location and the heterogeneity of aggregate size by the full width at half maximum (FWHM).

Since the surface potential plays an important role in the material-bacteria interactions, electrophoretic mobility measurements were collected to characterize the surface charge of the CuO samples. Data was collected for each sample in the biological media utilized in the cellular cytotoxicity assay (0.9% NaCl) and shows that the CuO materials are unstable, as indicated by the low magnitude of zeta potential values ( $0.05 \pm 8.53$  to  $-22.10 \pm 20.91$ ). This is to be expected given that the presence of ions is known to significantly influence nanoparticle aggregation.<sup>56</sup> Similarly, the stability of the CuO nanosheets over a range in pH was determined by measuring the electrophoretic mobility between pH 2 – 9 (Figure S4). The magnitude of material surface charge increased with increasing pH indicating that CuO nanosheets are more stable at higher pH.



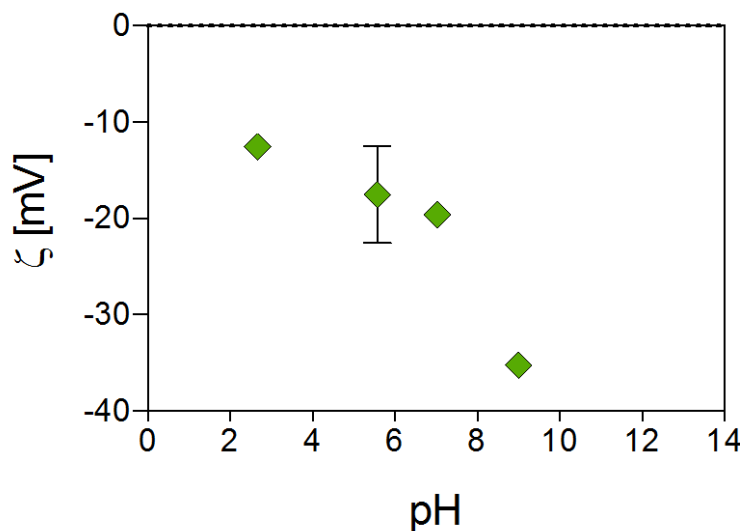

**Figure S4.** The surface charge of CuO nanosheets (reported as zeta potential) as a function of pH at a fixed concentration (20 ppm) and ionic strength (20 mM). The data represents the mean value from a set of six experiments with error bars representing the standard deviation.

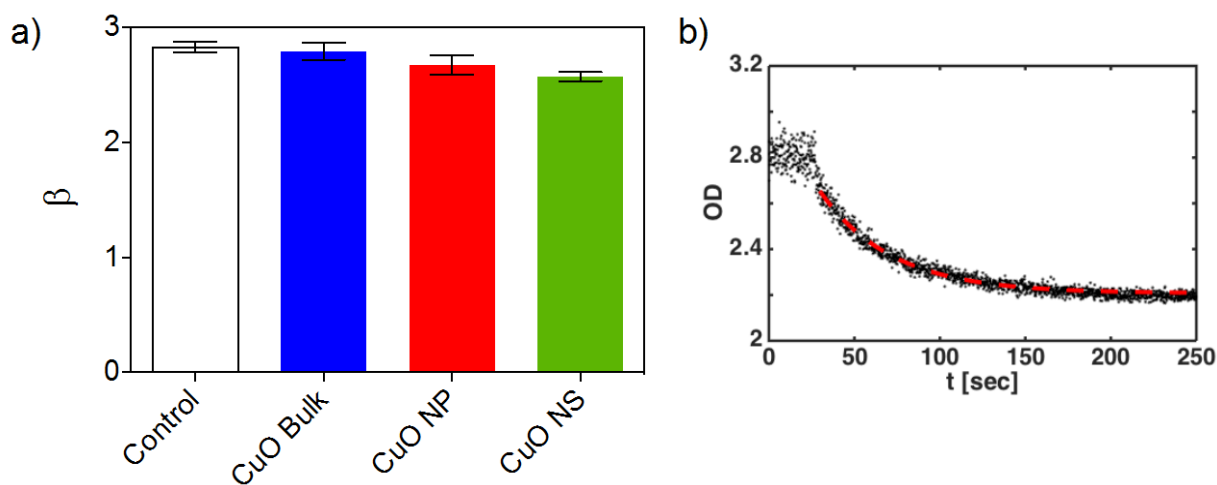

**Figure S5. a)**  $\beta$ -values for CuO bulk, nanopowder and nanosheets at 1 ppm. Control experiments correspond with the absence of CuO material. The lower the  $\beta$ -value, the higher the material catalytic activity. Each experimental value represents the mean from a set of five experiments with error bars that correspond to the standard deviation. **b)**  $\beta$ -values obtained from the fitting equation (Eq 4). ANOVA and subsequent comparison of means test showed that the difference in the values of CuO nanopowder and nanosheets is statistically significant ( $\alpha = 0.05$ , p-value < 0.0005).

## Kinetic Models Applied to Cytotoxicity Data

### Glutathione Oxidation

$A$ : Concentration of GSH  $\left(\frac{\text{moles}}{\text{Liter}}\right)$

$B$ : Concentration of CuO sites  $\left(\frac{\text{meters}^2}{\text{Liter}}\right)$

$k$ : rate constant  $\left(\frac{\text{Liters}}{\text{meters}^2 \times \text{minutes}}\right)$

%O: Percent oxidation of GSH (unitless)

$A_0$ : Initial concentration of GSH  $\left(\frac{\text{moles}}{\text{Liter}}\right)$

$t$ : time (minutes)

Derivation:

$$\frac{dA}{dt} = -kAB \quad (1)$$

The rate of GSH oxidation at any time  $t$  is dependent solely upon the concentration of GSH and the concentration of sites of CuO, here represented as a surface area per liter. Solving for  $A$ :

$$\frac{dA}{dt} = -kAB \rightarrow \frac{dA}{A} = -kBdt \rightarrow \int \frac{1}{A} dA = -kB \int dt \rightarrow$$

$$\ln A = -kBt + C \quad (2),$$

where  $C$  is a constant of integration. It should be noted that for this integration  $B$  was held constant, that is the concentration of CuO sites is constant (according to the assumption that adsorption of GSH and desorption of GSSG from the CuO surface is fast). If we create a log plot of GSH concentration with respect to time ( $\ln A$  versus  $t$ ) we can determine the value of  $C$  (by setting  $t = 0$ , which is  $\ln A_0$ ), but more importantly we can determine the value of  $k$  from the slope.

Data:

| CuO nanopowder    | 0 min | 15 min | 30 min | 45 min | 60 min | 120 min |
|-------------------|-------|--------|--------|--------|--------|---------|
| Mean %Oxidation   | 0.000 | 16.07  | 14.39  | 34.17  | 64.50  | 90.53   |
| GSH concentration | 3.300 | 2.770  | 2.825  | 2.173  | 1.172  | 0.3124  |
| $\ln(A)$          | 1.194 | 1.019  | 1.039  | 0.7759 | 0.1584 | -1.163  |

| CuO nanosheets    | 0 min | 15 min  | 30 min | 45 min | 60 min |
|-------------------|-------|---------|--------|--------|--------|
| Mean %Oxidation   | 0.000 | 72.28   | 94.34  | 96.66  | 94.80  |
| GSH concentration | 3.300 | 0.9148  | 0.1867 | 0.1101 | 0.1715 |
| $\ln(A)$          | 1.194 | -0.0890 | -1.678 | -2.207 | -1.763 |

The second row, mean %Oxidation, was determined by averaging each column of the data collected. It was then converted to concentrations of GSH using the initial GSH concentration ( $A_0$ ) using equation (3) below.

$$\frac{A_0 - A}{A_0} \times 100\% = \%Oxidation \quad (3)$$

Solving for  $A$  yields:  $A = A_0 \left(1 - \frac{\%Oxidation}{100}\right)$ , which is the third row in the table above. The fourth row is the natural log of each cell in the third row.

The plots of  $\ln A$  vs  $t$  can be found in Figure 6a. Note that the 60-minute time point for the nanosheets was omitted and was considered to be an outlier. The best fit lines drawn here are linear regressions constrained with a y-intercept of 1.19 (the natural log of the initial concentration of glutathione,  $A_0$ ). The  $R^2$  values are 0.9121 and 0.9645 for the nanoparticles and the nanosheets respectively, but may be increased if the constraint on the y-intercept was relaxed.

Using equation (2) and the slope of the fit lines we can discern the kinetic rate constants of glutathione oxidation for each the CuO nanoparticles and the nanosheets.

Nanoparticles:

$$\ln A = -kBt + C \rightarrow \ln A = -0.0175t + 1.19 \rightarrow -0.0175 = -kB$$

$$\rightarrow k = 9.51 \times 10^{-3} \frac{\text{Liters}}{\text{meters}^2 \times \text{minutes}}$$

Nanosheets:

$$\ln A = -kBt + C \rightarrow \ln A = -0.0175t + 1.19 \rightarrow -0.0819 = -kB$$

$$\rightarrow k = 20.48 \times 10^{-3} \frac{\text{Liters}}{\text{meters}^2 \times \text{minutes}}$$

The concentration of CuO sites,  $B$ , was calculated using the mass loading of CuO (0.2 mg/ml in 10 ml) and the measured surface area (9.2 m<sup>2</sup>/g and 20.00 m<sup>2</sup>/g for nanoparticles and nanosheets, respectively). The values of  $B$  were found to be 1.84 m<sup>2</sup>/L for the nanoparticles and 4.00 m<sup>2</sup>/L for the nanosheets.

*Reduction of CFU/mL*

$A$ : Concentration of living cells  $\left(\frac{\text{cells}}{\text{Liter}}\right)$

$B$ : Concentration of CuO sites  $\left(\frac{\text{meters}^2}{\text{Liter}}\right)$

$k$ : rate constant  $\left(\frac{\text{Liters}}{\text{meters}^2 \times \text{minutes}}\right)$

%Reduction: % Reduction of CFU's (unitless)

$A_0$ : Initial concentration of living cells  $\left(\frac{\text{moles}}{\text{Liter}}\right)$

$t$ : time (minutes)

As before:  $\ln A = -k B t + C$ , where  $A$  is now the concentration of living cells (cells/L),  $k$  is the rate constant for cells dying,  $B$  is the concentration of site of CuO (sites/L),  $t$  is time, and  $C$  is a constant. As addressed above this is a first order model assuming no CuO is consumed.

Data:

|                       |          |          |          |          |          |          |          |
|-----------------------|----------|----------|----------|----------|----------|----------|----------|
| <b>CuO nanopowder</b> | 1.84E-03 | 9.20E-04 | 3.68E-04 | 1.84E-04 | 9.20E-05 | 1.38E-03 | 0.00E+00 |
| Mean %Oxidation       | 5.71E+01 | 6.90E+00 | 4.08E+00 | 6.90E+00 | 3.51E+00 | 3.26E+01 | 0.00E+00 |
| Cell concentration    | 4.29E+08 | 9.31E+08 | 9.59E+08 | 1.07E+09 | 9.65E+08 | 6.74E+08 | 1.00E+09 |
| ln (A)                | 1.99E+01 | 2.07E+01 | 2.07E+01 | 2.08E+01 | 2.07E+01 | 2.03E+01 | 2.07E+01 |

|                      |          |          |          |          |          |          |
|----------------------|----------|----------|----------|----------|----------|----------|
| <b>CuO nanosheet</b> | 4.00E-03 | 2.00E-03 | 8.00E-04 | 4.00E-04 | 2.00E-04 | 0.00E+00 |
| Mean %Oxidation      | 1.00E+02 | 9.45E+01 | 7.40E+01 | 3.75E+00 | 1.03E+01 | 0.00E+00 |
| Cell concentration   | 0.00E+00 | 5.54E+07 | 2.60E+08 | 9.63E+08 | 8.97E+08 | 1.00E+09 |
| ln (A)               | NaN      | 1.78E+01 | 1.94E+01 | 2.07E+01 | 2.06E+01 | 2.07E+01 |

Also as before:

$$A = A_0 \left( 1 - \frac{\%Reduction}{100} \right)$$

This time, the independent variable is  $B$  and not  $t$  so the graph must reflect this. The top row are the set of all  $B$  values calculated similarly as before using the mass loading per volume of CuO and the respective specific surface areas. The plot of  $\ln A$  vs  $B$  is shown in Figure 6b for the nanoparticles and the nanosheets. The best fit lines drawn here are linear regressions constrained with a y-intercept of 20.72 (the natural log of the initial cell concentration,  $A_0$ ). The  $R^2$  values are 0.7825 and 0.9430 for the nanoparticles and the nanosheets respectively, but may be increased if the constraint on the y-intercept was relaxed.

As before, using equation (2) and the slope of the fit lines we can discern the kinetic rate constants of cell death for each the CuO nanoparticles and the nanosheets. This time, though, we divide the slope by  $-t$  instead of  $-B$ .

Nanoparticles:

$$k = 5.695 \frac{\text{Liters}}{\text{meters}^2 \times \text{minutes}}$$

Nanosheets:

$$k = 23.73 \frac{\text{Liters}}{\text{meters}^2 \times \text{minutes}}$$

In this analysis the rate constant for the nanosheets is approximately 4 times that of the nanoparticles, however the  $R^2$  value for the best fit line for the nanoparticles is only 0.7825, which is rather low. In an effort to improve the goodness of fit, a second order model was investigated.

$$\ln A = -kB^2t + C \quad (4)$$

This implies that two CuO sites are required to kill a cell instead of just one. A plot of  $\ln A$  against  $B^2$  is found in Figure 6c. Again, the best fit lines drawn here are linear regressions constrained with a y-intercept of 20.72 (the natural log of the initial cell concentration,  $A_0$ ). The  $R^2$  value for the nanoparticles has improved to 0.954, but has worsened for the nanosheets to 0.8787 (again this would improve slightly with relaxed y-intercept constraint).

Now, using equation (4) and the slope of the fit lines we can discern the kinetic rate constants of cell death for the second order equations.

Nanoparticles:

$$k = 3853 \frac{\text{Liters}^2}{\text{meters}^4 \times \text{minutes}}$$

Nanosheets:

$$k = 12600 \frac{\text{Liters}^2}{\text{meters}^4 \times \text{minutes}}$$

The units of these rate constants are different than the previous ones because the units of  $k$  must make the right hand side of equation (4) dimensionless. Since  $B$  is now a squared term, so are its units so the units of  $k$  must compensate. For this reason it is unreasonable to compare  $k$  constants across models, however comparing within the second order model it appears that  $k$  constant for the nanosheets is a little over 3 times that of the nanoparticles.

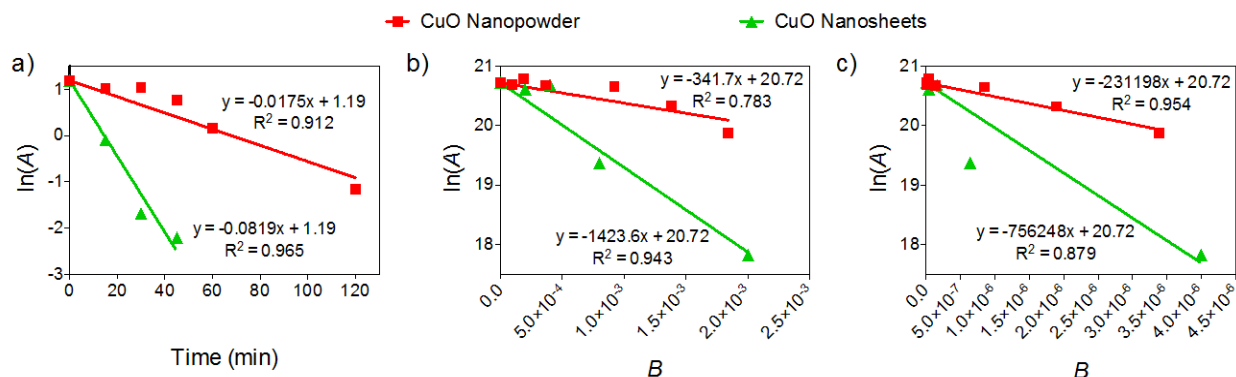

**Figure S6.** Plots of the results obtained from the application of kinetic models to the cytotoxicity data for CuO nanopowder and nanosheets in Figure 2. a) First order kinetic model applied to the GSH oxidation results of  $\ln A$  versus time ( $t$ ), where  $A$  is the concentration of GSH. b) First order kinetics model applied to the reduction of CFU/mL results of  $\ln A$  versus the concentration of CuO sites,  $B$ , where  $A$  is the concentration of living cells. c) Second order kinetics model applied to the reduction of CFU/mL results with the variables defined as in b). Slopes of the best-fit line provide insight into the rate constant,  $k$ , for each scenario.

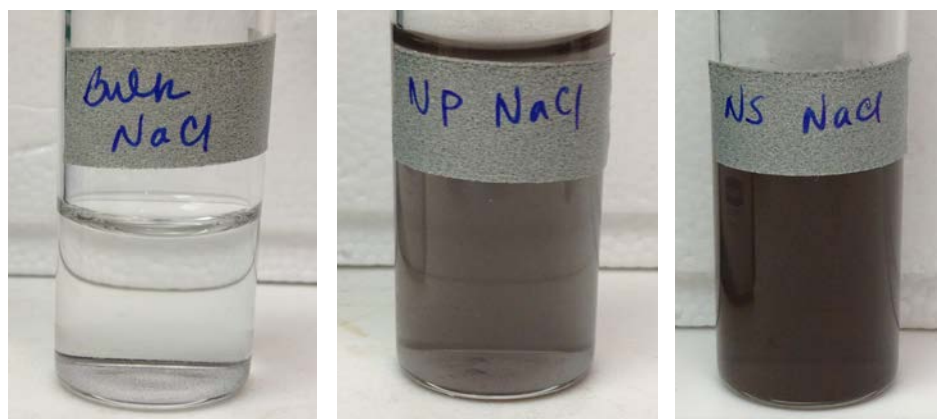

**Figure S7.** Bulk CuO, CuO nanopowder and CuO nanosheets in 0.9% NaCl after 15 minute sonication.

515

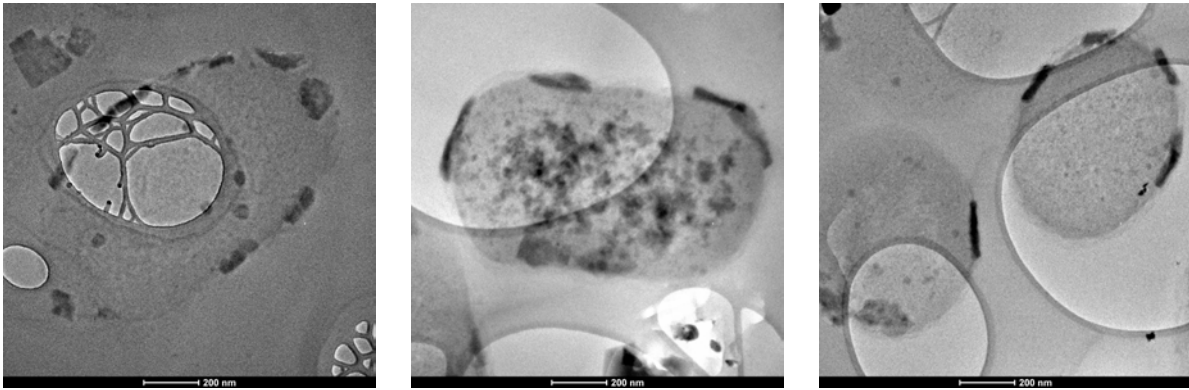

516

517

518

519

520

521

522

523

**Figure S8.** TEM micrographs showing the interaction and accumulation of n-CuO at the cell wall indicating the importance of physical interaction.

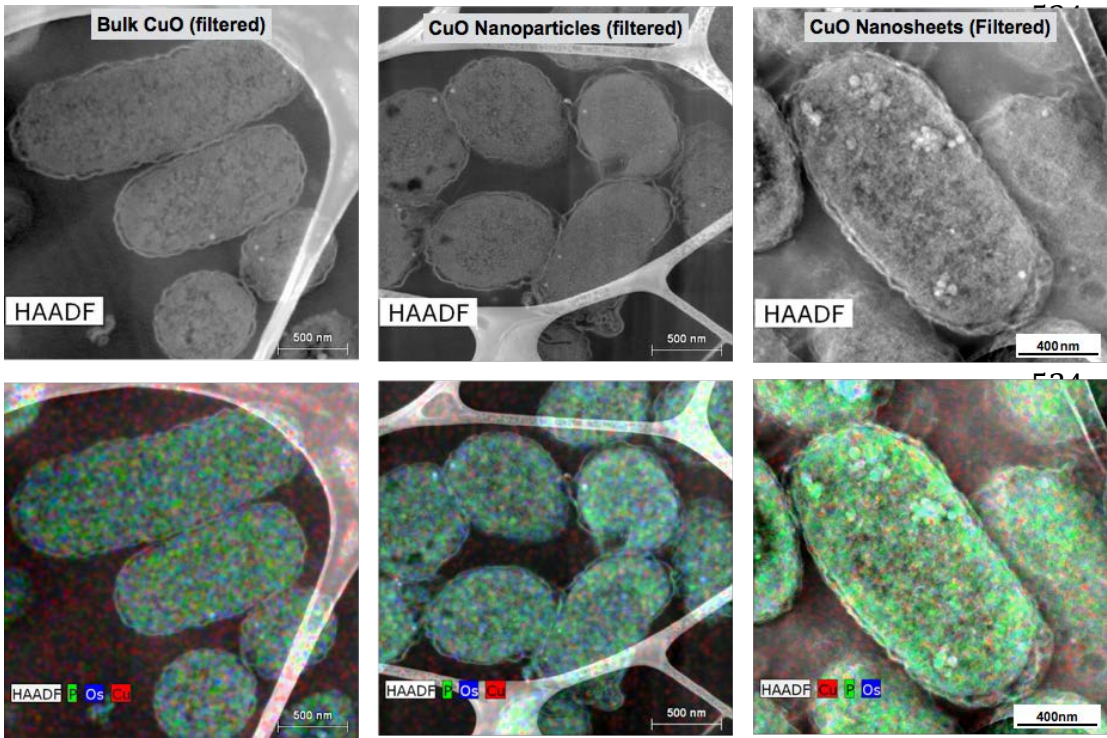

545

546

547

**Figure S9.** STEM-EELS micrographs of *E.coli* exposed to CuO filtrate showing no indication of intracellular CuO and confirming the absence of CuO in the filtered experimental dispersions.
